# Supplementary material
Source: Springer Nature journal article supplement (https://www.springermedizin.de/resource/supplementary/12943_2010_780_MOESM3_ESM.pdf/9554802)
Supplement: MOESM3 [file 9554802]

**A**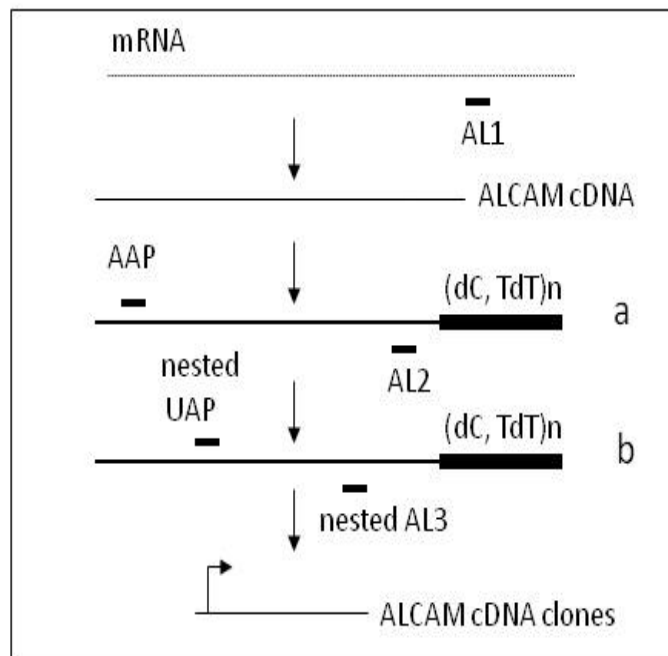**B**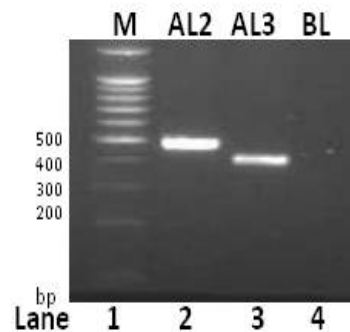**C**

<sup>→</sup> CAGAGCAGCCCGGAAGACCGGCTGCCGCCGCTGCCGCTGCTACCACCGCTGCCACCTGAG  
 -500 -496  
 GAGACCGCCGCCCCCGTCGCCGCCTCCTGCGAGTCCTTCTTAGCACCTGGCGTTTCAT  
<sup>→</sup> GCACATTGCCACTGCCATTATTATTATCATTCCAAATACAAGGAAAATAAAAGAAGATACC  
 -379 -349  
 AGCGAAAAGAACCGCTTACACCTTTCGAATTACTCAAGTGTCTCCTGGAAACAGAGGGT  
 CGTTGTCCCCGGAGGAGCAGCCGAAGGCCCGTGGCTGGTGTTGACCGGGAGGAGGAGGAG  
 TTGGGGGCATTGCGTGGTGGAAAGTTGCGTGCGGCAGAGAACCGAAGGT  
 nested AL3 primer
